# Supplementary material
Source: Springer Nature journal article supplement (https://www.springermedizin.de/resource/supplementary/13075_2004_1209_MOESM8_ESM.pdf/9689232)

**Figure 6**

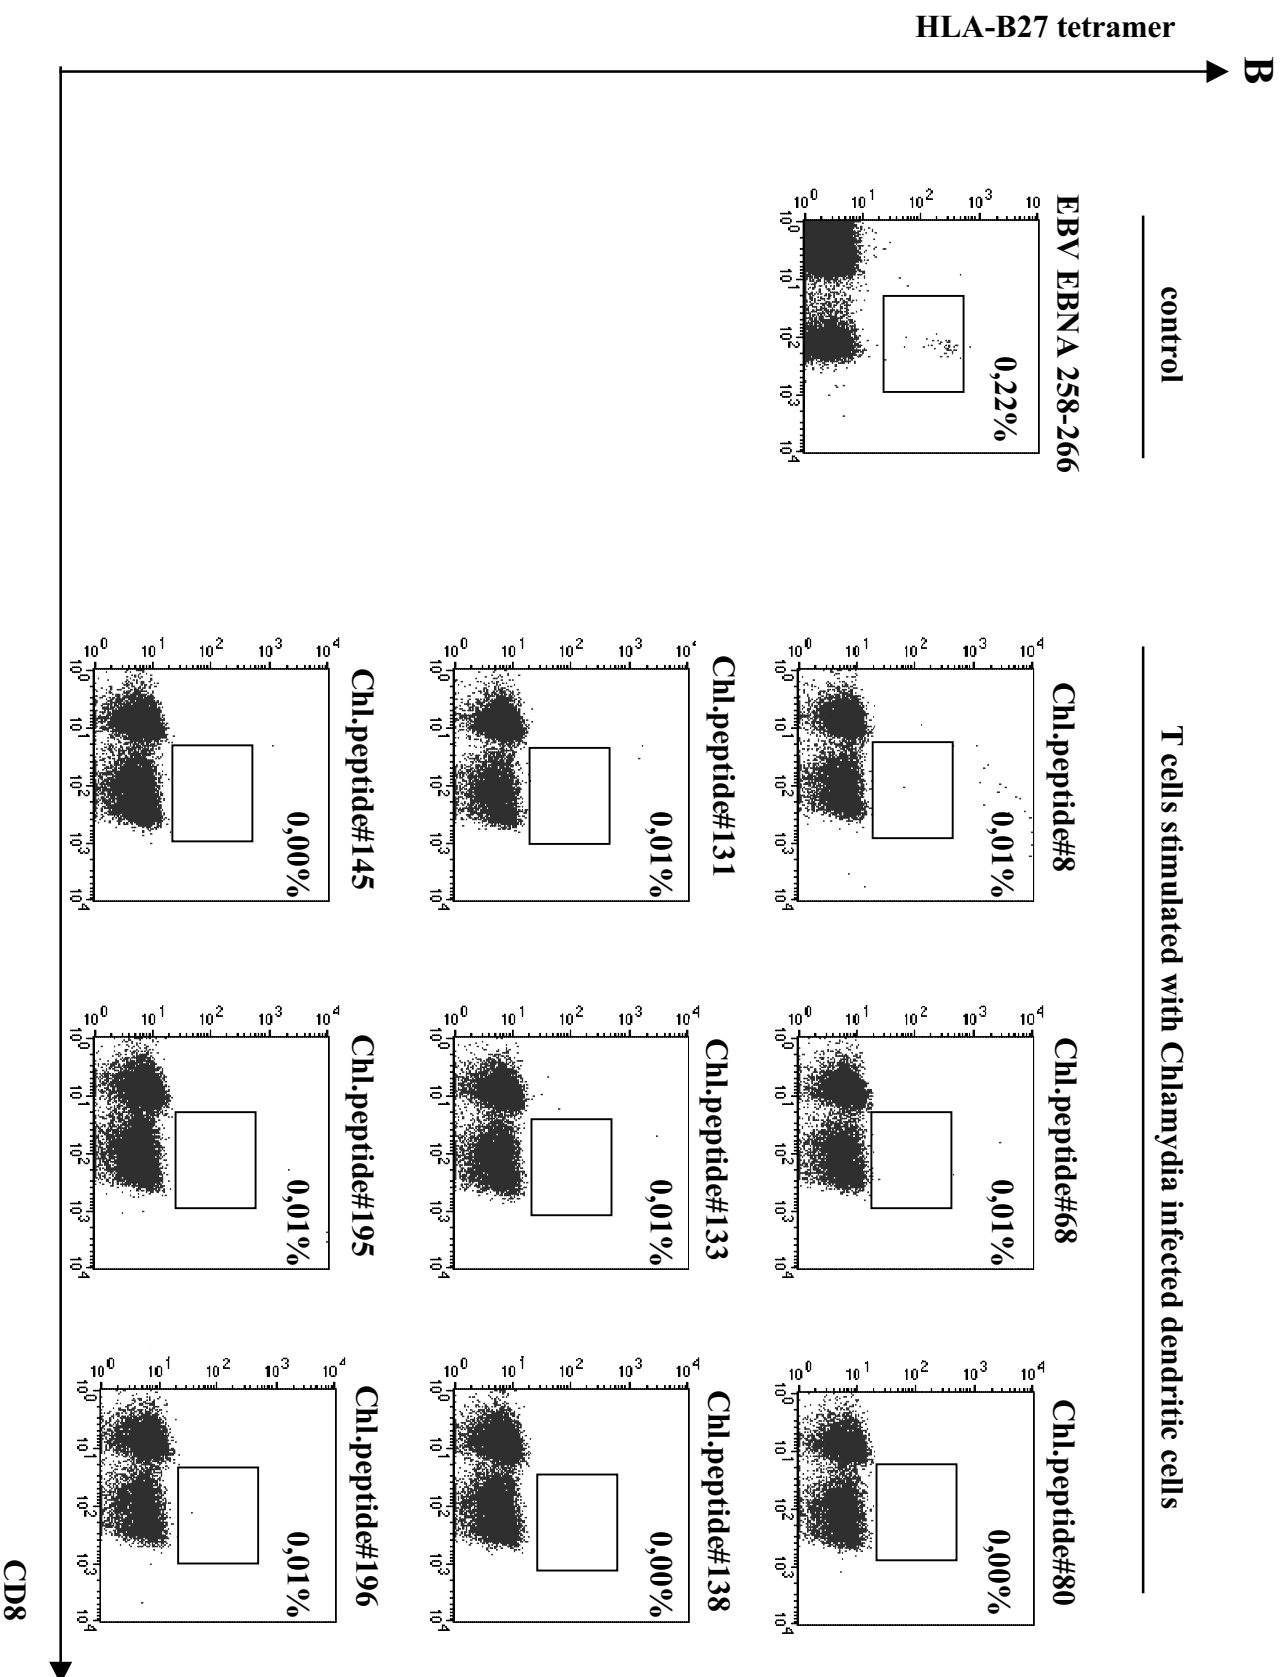

Supplement: MOESM8 [file 9689232]
